# Supplementary material
Source: MDPI journal article supplement (https://www.mdpi.com/2673-8112/3/3/25)
Supplement: s1 [file s1]

## Supplementary Materials

**Table S1.** Rapid IPC Assessment Tool for Hospitals

### A. Facility Information

|    |                    |            |                           |  |
|----|--------------------|------------|---------------------------|--|
| Q1 | Name of Hospital   |            | Code                      |  |
|    | Address            |            |                           |  |
|    | Name of Respondent | [Optional] | Designation/<br>Job Title |  |

  

|    |                                        | Response                                                 | Means of Verification |
|----|----------------------------------------|----------------------------------------------------------|-----------------------|
| Q2 | Is the facility DOH certified?         | <input type="checkbox"/> Yes <input type="checkbox"/> No |                       |
| Q3 | Is the facility PhilHealth accredited? | <input type="checkbox"/> Yes <input type="checkbox"/> No |                       |

### B. IPC Checklist

| No                                                            | Indicators                                                                                                                                     | Response                                                 | Means of Verification |
|---------------------------------------------------------------|------------------------------------------------------------------------------------------------------------------------------------------------|----------------------------------------------------------|-----------------------|
| <b>Engineering Controls</b>                                   |                                                                                                                                                |                                                          |                       |
| Q4                                                            | Does the triage area have a hand hygiene area: a handwashing area with soap and water and/or 70% rubbing alcohol?                              | <input type="checkbox"/> Yes <input type="checkbox"/> No |                       |
| Q5                                                            | Does the triage area have directional signages showing the way to emergency room isolation?                                                    | <input type="checkbox"/> Yes <input type="checkbox"/> No |                       |
| Q6                                                            | Do HCWs in triage conducting physical examination of patients with respiratory symptoms wear gowns, gloves, medical masks, and eye protection? | <input type="checkbox"/> Yes <input type="checkbox"/> No |                       |
| Q7                                                            | Do cleaners in triage area wear gowns gloves, medical masks, eye protection and boots or closed work shoes?                                    | <input type="checkbox"/> Yes <input type="checkbox"/> No |                       |
| Q8                                                            | Does the emergency room isolation have a contaminated zone?                                                                                    | <input type="checkbox"/> Yes <input type="checkbox"/> No |                       |
| Q9                                                            | Does the emergency room isolation have a buffer zone (potentially contaminated area)?                                                          | <input type="checkbox"/> Yes <input type="checkbox"/> No |                       |
| Q10                                                           | Emergency room isolation have a sterile zone (clean area)?                                                                                     | <input type="checkbox"/> Yes <input type="checkbox"/> No |                       |
| Q11                                                           | Does the COVID-19 isolation ward have a contaminated zone                                                                                      | <input type="checkbox"/> Yes <input type="checkbox"/> No |                       |
| Q12                                                           | Does the COVID-19 isolation ward have a buffer zone (potentially contaminated area)?                                                           | <input type="checkbox"/> Yes <input type="checkbox"/> No |                       |
| Q13                                                           | Does the COVID-19 isolation ward have a sterile zone (clean area)?                                                                             | <input type="checkbox"/> Yes <input type="checkbox"/> No |                       |
| <b>Environmental Controls</b>                                 |                                                                                                                                                |                                                          |                       |
| Q14                                                           | Cleans and disinfects surface and areas once a day?                                                                                            | <input type="checkbox"/> Yes <input type="checkbox"/> No |                       |
| Q15                                                           | Cleans and disinfects surfaces and areas used by the patient upon discharge?                                                                   | <input type="checkbox"/> Yes <input type="checkbox"/> No |                       |
| Q16                                                           | Uses 70% ethyl alcohol or 0.1% sodium hypochlorite to disinfect frequently touched surfaces and reusable dedicated equipment?                  | <input type="checkbox"/> Yes <input type="checkbox"/> No |                       |
| Q17                                                           | Uses 0.5% sodium hypochlorite to disinfect surfaces/walls with blood or bodily fluids spills?                                                  | <input type="checkbox"/> Yes <input type="checkbox"/> No |                       |
| Q18                                                           | Follows ≥30 minutes standard waiting time for the disinfection to settle?                                                                      | <input type="checkbox"/> Yes <input type="checkbox"/> No |                       |
| <b>Waste Management (Segregation, Collection and Storage)</b> |                                                                                                                                                |                                                          |                       |
| Q19                                                           | Has appropriate labelling of waste bins?                                                                                                       | <input type="checkbox"/> Yes <input type="checkbox"/> No |                       |
| Q20                                                           | Uses color-coded bags for the waste bins?                                                                                                      | <input type="checkbox"/> Yes <input type="checkbox"/> No |                       |
| Q21                                                           | Has posters/printed instructions showing what type of waste should be disposed of in each waste bin?                                           | <input type="checkbox"/> Yes <input type="checkbox"/> No |                       |
| Q22                                                           | Has a designated temporary collection point for infectious wastes prior to transporting to a central storage area?                             | <input type="checkbox"/> Yes <input type="checkbox"/> No |                       |
| Q23                                                           | Is the temporary collection point for infectious wastes properly covered/sealed?                                                               | <input type="checkbox"/> Yes <input type="checkbox"/> No |                       |
| Q24                                                           | Is the temporary collection point far from patients and other public access areas?                                                             | <input type="checkbox"/> Yes <input type="checkbox"/> No |                       |

|                                |                                                                                  |                                                          |  |
|--------------------------------|----------------------------------------------------------------------------------|----------------------------------------------------------|--|
| Q25                            | Has a central storage for infectious waste?                                      | <input type="checkbox"/> Yes <input type="checkbox"/> No |  |
| Q26                            | Is the central storage area is near the exit gate/garbage pick-up/hauling point? | <input type="checkbox"/> Yes <input type="checkbox"/> No |  |
| <b>Administrative Controls</b> |                                                                                  |                                                          |  |
| Q27                            | Has a written policy on IPC?                                                     | <input type="checkbox"/> Yes <input type="checkbox"/> No |  |
| Q28                            | Has a dedicated IPC Officer to monitor compliance to protocols?                  | <input type="checkbox"/> Yes <input type="checkbox"/> No |  |
| Q29                            | Has trained HCWs on IPC?                                                         | <input type="checkbox"/> Yes <input type="checkbox"/> No |  |
| Q30                            | HCWs are familiar with the steps to proper handwashing?                          | <input type="checkbox"/> Yes <input type="checkbox"/> No |  |
| Q31                            | HCWs are familiar with the steps to proper donning of PPEs?                      | <input type="checkbox"/> Yes <input type="checkbox"/> No |  |
| Q32                            | HCWs are familiar with the steps to proper doffing of PPEs?                      | <input type="checkbox"/> Yes <input type="checkbox"/> No |  |
| Q33                            | Has promotional materials on proper handwashing?                                 | <input type="checkbox"/> Yes <input type="checkbox"/> No |  |
| Q34                            | Has promotional materials on respiratory etiquette and physical distancing?      | <input type="checkbox"/> Yes <input type="checkbox"/> No |  |
| Q35                            | Has promotional materials on use of PPEs per zone?                               | <input type="checkbox"/> Yes <input type="checkbox"/> No |  |

**Table S2.** Rapid IPC Assessment Tool for Temporary Treatment and Monitoring Facilities

**A. Facility Information**

|    |                     |                                                                                                                                                        |                           |  |
|----|---------------------|--------------------------------------------------------------------------------------------------------------------------------------------------------|---------------------------|--|
| Q1 | Name of Facility    |                                                                                                                                                        | Code                      |  |
|    | Description of TTMF | [Please describe the facility with respect to its current structure, example gym, school dormitory, sports stadium, hotel, open space with tents etc.] |                           |  |
|    | Address             |                                                                                                                                                        |                           |  |
|    | Name of Respondent  | [Optional]                                                                                                                                             | Designation/<br>Job Title |  |

|    |                                        | Response                                                 | Means of Verification |
|----|----------------------------------------|----------------------------------------------------------|-----------------------|
| Q2 | Is the facility DOH certified?         | <input type="checkbox"/> Yes <input type="checkbox"/> No |                       |
| Q3 | Is the facility PhilHealth accredited? | <input type="checkbox"/> Yes <input type="checkbox"/> No |                       |

**B. IPC Checklist**

| No                                                            | Indicators                                                                                                                    | Response                                                 | Means of Verification |
|---------------------------------------------------------------|-------------------------------------------------------------------------------------------------------------------------------|----------------------------------------------------------|-----------------------|
| <b>Engineering Controls</b>                                   |                                                                                                                               |                                                          |                       |
| Q4                                                            | Is the entrance and exit of HCWs connected to a clean/sterile area?                                                           | <input type="checkbox"/> Yes <input type="checkbox"/> No |                       |
| Q5                                                            | Does the entrance and exit of HCWs have directional signages?                                                                 | <input type="checkbox"/> Yes <input type="checkbox"/> No |                       |
| Q6                                                            | Is the entrance and exit of patients connected to a contaminated area?                                                        | <input type="checkbox"/> Yes <input type="checkbox"/> No |                       |
| Q7                                                            | Does the entrance and exit of patients have directional signages?                                                             | <input type="checkbox"/> Yes <input type="checkbox"/> No |                       |
|                                                               | Do HCWs use of the following PPEs:                                                                                            |                                                          |                       |
| Q8                                                            | Face mask                                                                                                                     | <input type="checkbox"/> Yes <input type="checkbox"/> No |                       |
| Q9                                                            | Eye protection                                                                                                                | <input type="checkbox"/> Yes <input type="checkbox"/> No |                       |
| Q10                                                           | Gloves                                                                                                                        | <input type="checkbox"/> Yes <input type="checkbox"/> No |                       |
| Q11                                                           | Gown                                                                                                                          | <input type="checkbox"/> Yes <input type="checkbox"/> No |                       |
| Q12                                                           | Has a designated contaminated zone                                                                                            | <input type="checkbox"/> Yes <input type="checkbox"/> No |                       |
| Q13                                                           | Has a designated buffer zone                                                                                                  |                                                          |                       |
| Q14                                                           | Has a designated sterile zone                                                                                                 |                                                          |                       |
| <b>Environmental Controls</b>                                 |                                                                                                                               |                                                          |                       |
| Q15                                                           | Cleans and disinfects surface and areas once a day?                                                                           | <input type="checkbox"/> Yes <input type="checkbox"/> No |                       |
| Q15                                                           | Cleans and disinfects surfaces and areas used by the patient upon discharge?                                                  | <input type="checkbox"/> Yes <input type="checkbox"/> No |                       |
| Q16                                                           | Uses 70% ethyl alcohol or 0.1% sodium hypochlorite to disinfect frequently touched surfaces and reusable dedicated equipment? | <input type="checkbox"/> Yes <input type="checkbox"/> No |                       |
| Q17                                                           | Uses 0.5% sodium hypochlorite to disinfect surfaces/walls with blood or bodily fluids spills?                                 | <input type="checkbox"/> Yes <input type="checkbox"/> No |                       |
| Q18                                                           | Follows ≥30 minutes standard waiting time for the disinfection to settle?                                                     | <input type="checkbox"/> Yes <input type="checkbox"/> No |                       |
| <b>Waste Management (Segregation, Collection and Storage)</b> |                                                                                                                               |                                                          |                       |
| Q19                                                           | Has appropriate labelling of waste bins?                                                                                      | <input type="checkbox"/> Yes <input type="checkbox"/> No |                       |
| Q20                                                           | Uses color-coded bags for the waste bins?                                                                                     | <input type="checkbox"/> Yes <input type="checkbox"/> No |                       |
| Q21                                                           | Has posters/printed instructions showing what type of waste should be disposed of in each waste bin?                          | <input type="checkbox"/> Yes <input type="checkbox"/> No |                       |
| Q22                                                           | Has a designated temporary collection point for infectious wastes prior to transporting to a central storage area?            | <input type="checkbox"/> Yes <input type="checkbox"/> No |                       |
| Q23                                                           | Is the temporary collection point for infectious wastes properly covered/sealed?                                              | <input type="checkbox"/> Yes <input type="checkbox"/> No |                       |
| Q24                                                           | Is the temporary collection point far from patients and other public access areas?                                            | <input type="checkbox"/> Yes <input type="checkbox"/> No |                       |
| Q25                                                           | Has a central storage for infectious waste?                                                                                   | <input type="checkbox"/> Yes <input type="checkbox"/> No |                       |
| Q26                                                           | Is the central storage area is near the exit gate/garbage pick-up/hauling point?                                              | <input type="checkbox"/> Yes <input type="checkbox"/> No |                       |
| <b>Administrative Controls</b>                                |                                                                                                                               |                                                          |                       |

|     |                                                                             |                                                          |  |
|-----|-----------------------------------------------------------------------------|----------------------------------------------------------|--|
| Q27 | Has a written policy on IPC?                                                | <input type="checkbox"/> Yes <input type="checkbox"/> No |  |
| Q28 | Has a dedicated IPC Officer to monitor compliance to protocols?             | <input type="checkbox"/> Yes <input type="checkbox"/> No |  |
| Q29 | Has trained HCWs on IPC?                                                    | <input type="checkbox"/> Yes <input type="checkbox"/> No |  |
| Q30 | HCWs are familiar with the steps to proper handwashing?                     | <input type="checkbox"/> Yes <input type="checkbox"/> No |  |
| Q31 | HCWs are familiar with the steps to proper donning of PPEs?                 | <input type="checkbox"/> Yes <input type="checkbox"/> No |  |
| Q32 | HCWs are familiar with the steps to proper doffing of PPEs?                 | <input type="checkbox"/> Yes <input type="checkbox"/> No |  |
| Q33 | Has promotional materials on proper handwashing?                            | <input type="checkbox"/> Yes <input type="checkbox"/> No |  |
| Q34 | Has promotional materials on respiratory etiquette and physical distancing? | <input type="checkbox"/> Yes <input type="checkbox"/> No |  |
| Q35 | Has promotional materials on use of PPEs per zone?                          | <input type="checkbox"/> Yes <input type="checkbox"/> No |  |
